# Supplementary material
Source: HighWire-hosted journal article supplement (https://jnm.snmjournals.org/highwire/filestream/94002/field_highwire_adjunct_files/0/61119_Supplemental_Figure.pdf)
Supplement: 61119_Supplemental_Figure.pdf [file 61119_Supplemental_Figure.pdf]

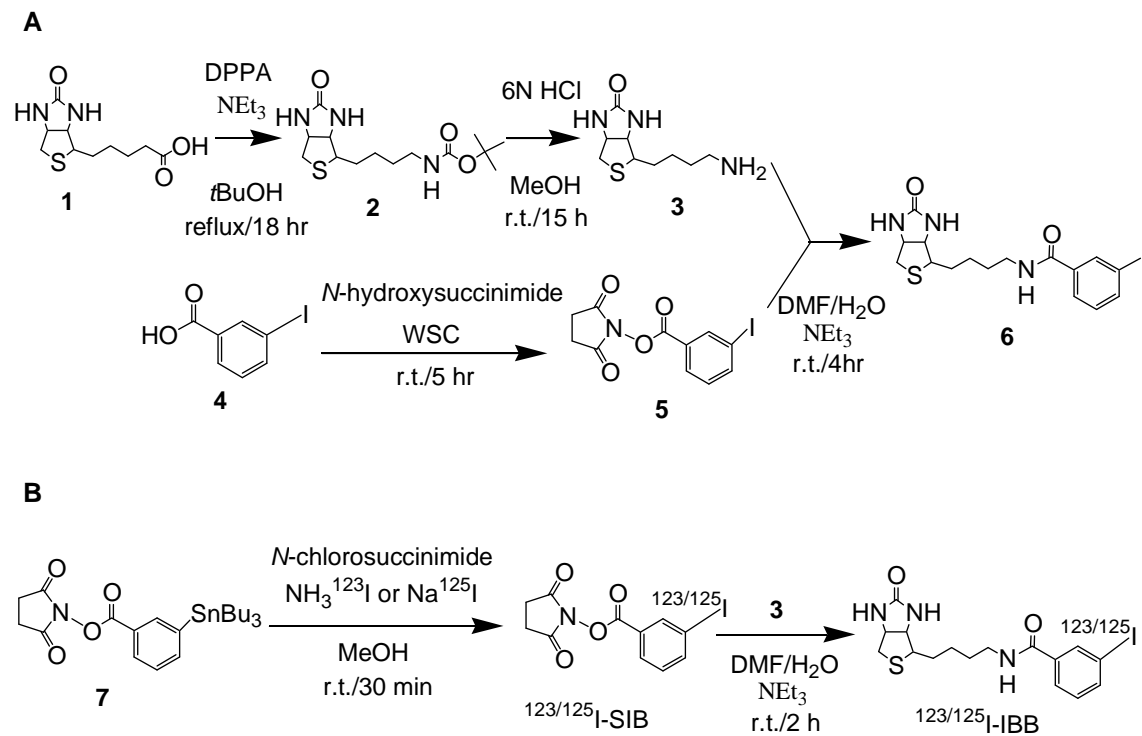

**Supplemental Figure. A, Synthesis of IBB**

**B, Radiosynthesis of  $^{123/125}\text{I}$ -IBB**

Compound 1: D-biotin, Compound 2: *N*-*t*Boc norbiotinamine, Compound 3: norbiotinamine, Compound 4: *m*-iodobenzoic acid, Compound 5: *N*-succinimidyl 3-iodobenzoate (SIB), Compound 6: (3-iodobenzoyl)norbiotinamine (IBB), Compound 7: *N*-succinimidyl 3-(tributylstannyl)benzoate.
